# Supplementary material for: Preferential growth of short aligned, metallic-rich single-walled carbon nanotubes from perpendicular layered double hydroxide film
Source: Royal Society of Chemistry journal article supplement (doi:10.1039/c2nr00043a), 2012-01-01
Supplement: c2nr00043a.pdf [file c2nr00043a.pdf]

## Electronic Supplementary Information for

### **Preferential growth of short aligned, metallic-rich single-walled carbon nanotubes from perpendicular layered double hydroxide film**

*Meng-Qiang Zhao, Gui-Li Tian, Qiang Zhang<sup>\*</sup>, Jia-Qi Huang, Jing-Qi Nie, Fei Wei<sup>\*1</sup>*

Beijing Key Laboratory of Green Chemical Reaction Engineering and Technology,

Department of Chemical Engineering, Tsinghua University, Beijing 100084, China

---

<sup>1</sup> Corresponding authors. Fax: +86 10 6277 2051;  
E-mail address: [zhang-qiang@mails.tsinghua.edu.cn](mailto:zhang-qiang@mails.tsinghua.edu.cn) (Zhang Q.),  
[wf-dce@tsinghua.edu.cn](mailto:wf-dce@tsinghua.edu.cn) (Wei F.).

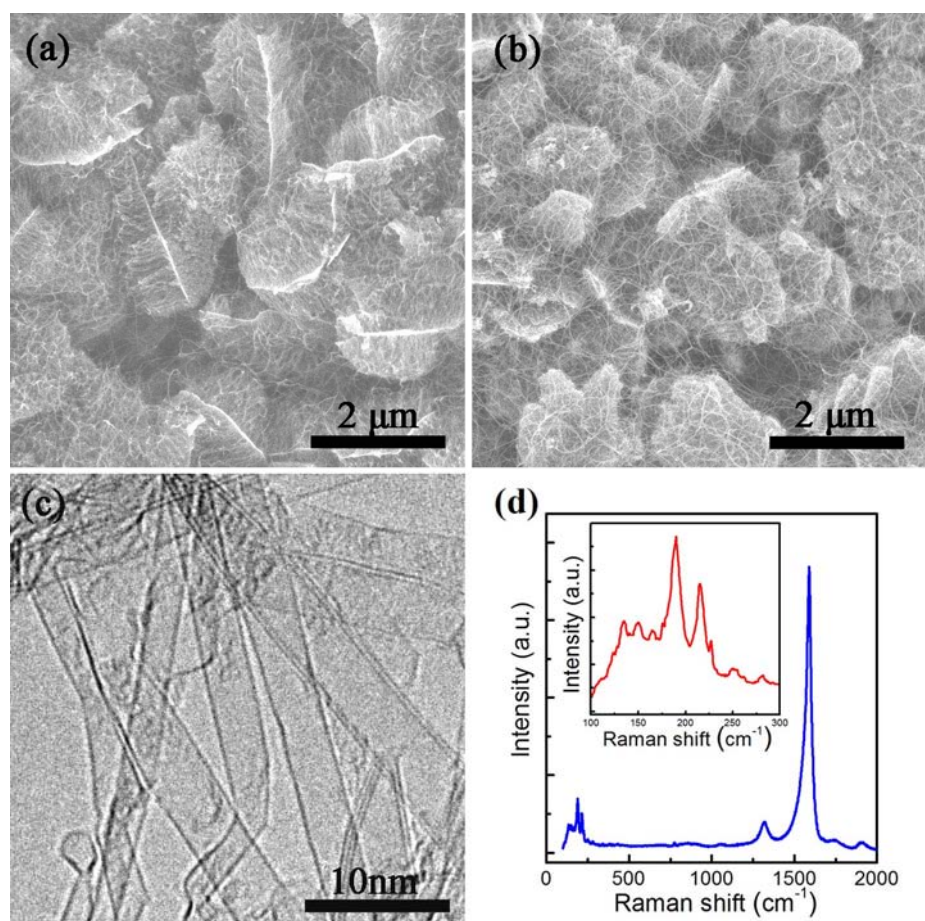

**Figure S1** Scanning electron microscopy (SEM) images showing the morphology of the as-grown short aligned SWCNTs from FeMoMgAl LDH flakes at the top surface (a) and the entangled SWCNTs from FeMoMgAl LDH flakes below the top surface of the LDH aggregates (b) with a growth duration of 30 min; (c) High resolution transmission electron microscopy (TEM) image and (d) Raman spectrum of the as-grown SWCNTs from the stacked FeMoMgAl LDH aggregates.

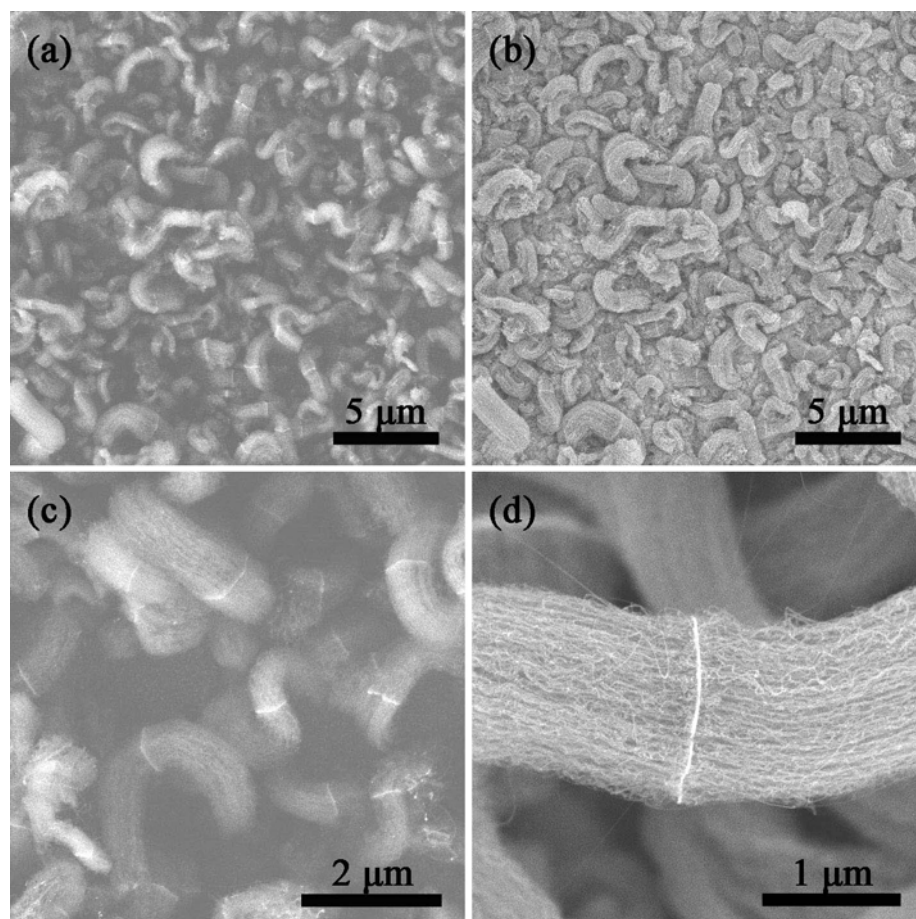

**Figure S2** SEM images showing the morphology of the as-grown aligned SWCNTs from FeMoMgAl LDH film on mica with a growth duration of 1 h.
